# Supplementary material for: A native promoter and inclusion of an intron is necessary for efficient expression of GFP or mRFP in Armillaria mellea
Source: PubMed Central journal article supplement (PMC4935854; doi:10.1038/srep29226), 2016-07-07
Supplement: srep29226-s1.pdf [file srep29226-s1.pdf]

## A native promoter and inclusion of an intron is necessary for efficient expression of GFP or mRFP in *Armillaria mellea*

Kathryn L. Ford <sup>a</sup>, Kendra Baumgartner <sup>b</sup>, Béatrice Henricot <sup>c1</sup>, Andy M. Bailey <sup>a</sup>, Gary D. Foster <sup>a\*</sup>

<sup>a</sup> School of Biological Sciences, Life Sciences Building, University of Bristol, 24 Tyndall Avenue, Bristol, BS8 1TQ, United Kingdom.

<sup>b</sup> United States Department of Agriculture-Agricultural Research Service, 363 Hutchison Hall, University of California, One Shields Avenue, Davis, CA 95616, United States.

<sup>c</sup> The Royal Horticultural Society, Wisley, Woking, Surrey, GU23 6QB, United Kingdom.

<sup>1</sup> Current address: Forest Research, Northern Research Station, Roslin, Midlothian, EH25 9SY, United Kingdom.

\* Corresponding author: Tel: +44 (0) 117 3941178. Fax: +44 (0) 117 331 7985. E-mail: Gary.Foster@bristol.ac.uk

**Supplementary Table S1 - Construction details for plasmids**

| Plasmid                    | Primers   | Fragments used to make plasmids and their sources                                |
|----------------------------|-----------|----------------------------------------------------------------------------------|
| <b>pCAM-hph-GFP</b>        | 1F + 2R   | <i>hph</i> cassette from pBGgHg                                                  |
|                            | 3F + 4R   | <i>Phanerochaete chrysosporium gpd</i> promoter from pGR4-GFP                    |
|                            | 7BF + 8R  | eGFP from pGR4-4iGM3                                                             |
|                            | 9F + 10R  | <i>Aspergillus nidulans trpC</i> terminator from pGR4-4iGM3                      |
| <b>pCAM-hph-mRFP</b>       | 1F + 2R   | <i>hph</i> cassette from pBGgHg                                                  |
|                            | 3F + 4R   | <i>P. chrysosporium gpd</i> promoter from pGR4-GFP                               |
|                            | 7AF + 8AR | mRFP from pYES-hph-RFP004                                                        |
|                            | 9F + 10R  | <i>A. nidulans trpC</i> terminator from pGR4-4iGM3                               |
| <b>pCAM-hph-Amgpd-GFP</b>  | 1F + 2R   | <i>hph</i> cassette from pBGgHg                                                  |
|                            | A + B     | 1 kb <i>gpd</i> promoter from <i>Armillaria mellea</i> ELDO17 (protein ID 13125) |
|                            | C + 10R   | eGFP through <i>A. nidulans trpC</i> terminator from pCAM-hph-siGFP              |
| <b>pCAM-hph-Amgpd-mRFP</b> | 1F + 2R   | <i>hph</i> cassette from pBGgHg                                                  |
|                            | A + B     | 1 kb <i>gpd</i> promoter from <i>A. mellea</i> ELDO17 (protein ID 13125)         |
|                            | M + 10R   | mRFP through <i>A. nidulans trpC</i> terminator from pCAM-hph-simRFP             |
| <b>pCAM-hph-LiGFP</b>      | 1F + 2R   | <i>hph</i> cassette from pBGgHg                                                  |
|                            | 3F + 4R   | <i>P. chrysosporium gpd</i> promoter from pGR4-GFP                               |
|                            | 5F + 6R   | Intron from <i>A. mellea</i> ELDO17 (EF547153; intron 11)                        |
|                            | 7F + 8R   | eGFP from pGR4-4iGM3                                                             |
|                            | 9F + 10R  | <i>A. nidulans trpC</i> terminator from pGR4-4iGM3                               |
| <b>pCAM-hph-siGFP</b>      | 1F + 2R   | <i>hph</i> cassette from pBGgHg                                                  |
|                            | 3F + 4R   | <i>P. chrysosporium gpd</i> promoter from pGR4-GFP                               |
|                            | 5AF + 6AR | Intron from <i>Armillaria mellea</i> DSM3731 (EF547152; intron 7)                |
|                            | 7F + 8R   | eGFP from pGR4-4iGM3                                                             |

|                              |           |                                                                                                                             |
|------------------------------|-----------|-----------------------------------------------------------------------------------------------------------------------------|
|                              | 9F + 10R  | <i>A. nidulans trpC</i> terminator from pGR4-4iGM3                                                                          |
| <b>pCAM-hph-simRFP</b>       | 1F + 2R   | <i>hph</i> cassette from pBGgHg                                                                                             |
|                              | 3F + 4R   | <i>P. chrysosporium gpd</i> promoter from pGR4-GFP                                                                          |
|                              | 5AF + 6BR | Intron from <i>Armillaria mellea</i> DSM3731 (EF547152; intron 7)                                                           |
|                              | 7CF + 8AR | mRFP from pYES-hph-RFP004                                                                                                   |
|                              | 9F + 10R  | <i>A. nidulans trpC</i> terminator from pGR4-4iGM3                                                                          |
| <b>pCAM-hph-iGFP</b>         | 1F + 4R   | <i>hph</i> cassette through <i>P. chrysosporium gpd</i> promoter from pCAM-hph-siGFP                                        |
|                              | K + L     | Primer dimer of 1 <sup>st</sup> intron from <i>A. mellea gpd</i> (protein ID 13125)                                         |
|                              | E + 10R   | eGFP through <i>A. nidulans trpC</i> terminator from plasmid pCAM-hph-siGFP                                                 |
| <b>pCAM-hph-xiGFP</b>        | 1F + 2R   | <i>hph</i> cassette from pBGgHg                                                                                             |
|                              | 3F + 8R   | <i>P. chrysosporium gpd</i> promoter, intron/exon region & eGFP from pGR4-GFP                                               |
|                              | 9F + 10R  | <i>A. nidulans trpC</i> terminator from pGR4-4iGM3                                                                          |
| <b>pCAM-hph-imRFP</b>        | 1F + 4R   | <i>hph</i> cassette through <i>P. chrysosporium gpd</i> promoter from pCAM-hph-siGFP                                        |
|                              | K + Q     | Primer dimer of 1 <sup>st</sup> intron from <i>A. mellea gpd</i> (protein ID 13125)                                         |
|                              | N + 10R   | mRFP through <i>A. nidulans trpC</i> terminator from pCAM-hph-simRFP                                                        |
| <b>pCAM-hph-Amgpd-iGFP</b>   | 1F + 2R   | <i>hph</i> cassette from pBGgHg                                                                                             |
|                              | A + D     | 1 kb <i>A. mellea</i> ELDO17 <i>gpd</i> promoter through to 1 <sup>st</sup> intron (protein ID 13125)                       |
|                              | E + 10R   | eGFP through <i>A. nidulans trpC</i> terminator from plasmid pCAM-hph-siGFP                                                 |
| <b>pCAM-hph-Amgpd-imRFP</b>  | 1F + 2R   | <i>hph</i> cassette from pBGgHg                                                                                             |
|                              | A + D     | 1 kb <i>A. mellea</i> ELDO17 <i>gpd</i> promoter through to 1 <sup>st</sup> intron (protein ID 13125)                       |
|                              | N + 10R   | mRFP through <i>A. nidulans trpC</i> terminator from pCAM-hph-simRFP                                                        |
| <b>pCAM-hph-Amgpd-xiGFP</b>  | 1F + 2R   | <i>hph</i> cassette from pBGgHg                                                                                             |
|                              | A + B     | 1 kb <i>gpd</i> promoter from <i>A. mellea</i> ELDO17 (protein ID 13125)                                                    |
|                              | R + 10R   | Intron/exon region from <i>P. chrysosporium gpd</i> through eGFP and <i>A. nidulans trpC</i> terminator from pCAM-hph-xiGFP |
| <b>pCAM-hph-Amgpd-ximRFP</b> | 1F + 2R   | <i>hph</i> cassette from pBGgHg                                                                                             |
|                              | A + B     | 1 kb <i>gpd</i> promoter from <i>A. mellea</i> ELDO17 (protein ID 13125)                                                    |
|                              | R + S     | Intron/exon region from <i>P. chrysosporium gpd</i> from pCAM-hph-xiGFP                                                     |
|                              | T + 10R   | mRFP through <i>A. nidulans trpC</i> terminator from pCAM-hph-simRFP                                                        |

pBGgHg was constructed by Chen *et al.* (2000)<sup>30</sup>, pGR4-GFP and pGR4-4iGM3 were constructed by Burns *et al.* (2005)<sup>23</sup> and pYES-hph-RFP004 was constructed by Collins *et al.* (2010)<sup>24</sup>.

**Supplementary Table S2 – Details of primers used during vector construction**

| Primer     | Direction | Sequence                                                        | Fragments used to make plasmids and their sources         | Primer binding site                                                      |
|------------|-----------|-----------------------------------------------------------------|-----------------------------------------------------------|--------------------------------------------------------------------------|
| <b>1F</b>  | F         | TGGGCCCGGCGCGCCGAATCCCGGGGATC<br>ACTGGATTTTGGTTTTAGGAATTAGAAATT | <i>hph</i> cassette from pBGgHg                           | Left border / CaMV 35S terminator                                        |
| <b>2R</b>  | R         | GAAGAAGAATTCAGAGGTCCGCAAGTAGAT                                  | <i>hph</i> cassette from pBGgHg                           | <i>A. bisporus gpdII</i> promoter                                        |
| <b>3F</b>  | F         | ATCTACTTGCGGACCTCTGAATTCTTCTCG<br>CATCTATTCGTGCCGAGAACCGGGCAAGC | <i>P. chrysosporium gpd</i> promoter from pGR4-GFP        | <i>A. bisporus gpdII</i> promoter / <i>P. chrysosporium gpd</i> promoter |
| <b>4R</b>  | R         | CGGCATGTTCAAGTAGTGTAGGGGTGGAGG                                  | <i>P. chrysosporium gpd</i> promoter from pGR4-GFP        | <i>P. chrysosporium gpd</i> promoter                                     |
| <b>5F</b>  | F         | CCTCCACCCCTACTACTTGAACATGCCGG<br>TGTGTTGGTGTGTACCGGCGCAAGGTC    | Intron from <i>A. mellea</i> ELDO17 (EF547153; intron 11) | <i>P. chrysosporium gpd</i> promoter / <i>A. mellea</i> intron           |
| <b>5AF</b> | F         | CCTCCACCCCTACTACTTGAACATGCCG<br>GTACGTTTCCATTATCTATACTTTGTGCGAT | Intron from <i>A. mellea</i> DSM3731 (EF547152; intron)   | <i>P. chrysosporium gpd</i> promoter / <i>A. mellea</i>                  |

|     |   | GGGCTGAGTGCCCGTGGGCTAG                                                                            | 7)                                                                                                          | intron                                                                                |
|-----|---|---------------------------------------------------------------------------------------------------|-------------------------------------------------------------------------------------------------------------|---------------------------------------------------------------------------------------|
| 6R  | R | CCCCGGTGAACAGCTCCTCGCCCTTGCTCA<br>CCTGCATTGTTCTCAAAAAATTGGAAGTTT                                  | Intron from <i>A. mellea</i> ELDO17<br>(EF547153; intron 11)                                                | <i>A. mellea</i> intron /<br>eGFP                                                     |
| 6AR | R | CCCGGTGAACAGCTCCTCGCCCTTGCTCACC<br>TAGCCACGGGCACTCAGCCCATCGACAAA<br>GTATAGATAATGGAACGTAC          | Intron from <i>A. mellea</i><br>DSM3731 (EF547152; intron<br>7)                                             | <i>A. mellea</i> intron /<br>eGFP                                                     |
| 6BR | R | GAACTCCTTGATGACGTCTCGGAGGAGGC<br>CTAGCCACGGGCACTCAGCCCATCGACAA<br>AGTATAGATAATGGAACGTAC           | Intron from <i>A. mellea</i><br>DSM3731 (EF547152; intron<br>7)                                             | <i>A. mellea</i> intron /<br>mRFP                                                     |
| 7F  | F | TGAGCAAGGGCGAGGAGCTGTTACCCGGG                                                                     | eGFP from pGR4-4iGM3                                                                                        | eGFP                                                                                  |
| 7AF | F | CCTCCACCCCTACTACTTGAACATGCCG<br>ATGGCCTCCTCCGAGGACGTCATCAAGGAG                                    | mRFP from pYES-hph-RFP004                                                                                   | <i>P. chrysosporium gpd</i><br>promoter / mRFP                                        |
| 7BF | F | CCTCCACCCCTACTACTTGAACATGCCG<br>TGAGCAAGGGCGAGGAGCTGTTACCCGGG                                     | eGFP from pGR4-4iGM3                                                                                        | <i>P. chrysosporium gpd</i><br>promoter / eGFP                                        |
| 7CF | F | GCCTCCTCCGAGGACGTCATCAAGGAGTTC                                                                    | mRFP from pYES-hph-RFP004                                                                                   | mRFP                                                                                  |
| 8R  | R | TTACTTGACAGCTCGTCCATGCCGAGAGT                                                                     | eGFP from pGR4-4iGM3                                                                                        | eGFP                                                                                  |
| 8AR | R | GTTTGATGATTTTCAGTAACGTTAAGTGGAT<br>TTAGGCGCCGGTGGAGTGGCGGCCCTCGG                                  | mRFP from pYES-hph-RFP004                                                                                   | mRFP gene / <i>A.</i><br><i>nidulans trpC</i><br>terminator                           |
| 9F  | F | ACTCTCGGCATGGACGAGCTGTACAAGTA<br>AATCCACTTAACGTTACTGAAATCATCAAAC                                  | <i>A. nidulans trpC</i> terminator<br>from pGR4-4iGM3                                                       | eGFP / <i>A. nidulans</i><br><i>trpC</i> terminator                                   |
| 10R | R | TCTTAAAGCTTGGCTGCAGTTCGACGGATC<br>GCGGCCCGAGTGTGATGGATATCTGCAGA                                   | <i>A. nidulans trpC</i> terminator<br>from pGR4-4iGM3                                                       | <i>A. nidulans trpC</i><br>terminator / right<br>border                               |
| A   | F | ATCTACTGCGGACCTCTGAATTCTTCTTC<br>AATTGGGTAGATGCTCTGTAAGTGCTCACG                                   | 1 kb <i>gpd</i> promoter from <i>A.</i><br><i>mellea</i> ELDO17 (protein ID<br>13125)                       | <i>A. bisporus gpdII</i><br>promoter / <i>A. mellea</i><br><i>gpd</i> promoter        |
| B   | R | CATGATGATTGCAGAAGTGAAGACGATGA                                                                     | 1 kb <i>gpd</i> promoter from <i>A.</i><br><i>mellea</i> ELDO17 (protein ID<br>13125)                       | <i>A. mellea gpd</i><br>promoter                                                      |
| C   | F | TCATCGTCTTACTTCTGCAATCATCATG<br>GTGAGCAAGGGCGAGGAGCTGTTACCCGGG                                    | eGFP through <i>A. nidulans trpC</i><br>terminator from plasmid<br>pCAM-hph-siGFP                           | <i>A. mellea gpd</i><br>promoter / eGFP                                               |
| D   | R | CTACGAGAATACAATGAATGAGTACAGATG                                                                    | 1 kb <i>A. mellea</i> ELDO17 <i>gpd</i><br>promoter through to 1 <sup>st</sup><br>intron (protein ID 13125) | <i>A. mellea gpd</i><br>promoter & 1st<br>intron                                      |
| E   | F | CATCTGACTCATTATTGATTCTCGTAG<br>GTGAGCAAGGGCGAGGAGCTGTTACCCGGG                                     | eGFP through <i>A. nidulans trpC</i><br>terminator from plasmid<br>pCAM-hph-siGFP                           | <i>A. mellea gpd</i><br>promoter & 1st<br>intron / eGFP                               |
| K   | F | ATCCTCCCTCCACCCCTACTACTTGAAC<br>ATGGTAGCGTCTCGTCTGTTGCTTACGTATC<br>ATCTGTAATCATTATTGATTCTCGTAG    | Primer dimer of 1 <sup>st</sup> intron<br>from <i>A. mellea gpd</i> (protein ID<br>13125)                   | <i>P. chrysosporium gpd</i><br>promoter / <i>A. mellea</i><br><i>gpd</i> & 1st intron |
| L   | R | CCCGGTGAACAGCTCCTCGCCCTTGCTCAC<br>CTACGAGAATACAATGAATGAGTACAGA<br>TGATACGTAAGCAACGACGAGACGCTACCAT | Primer dimer of 1 <sup>st</sup> intron<br>from <i>A. mellea gpd</i> (protein ID<br>13125)                   | <i>A. mellea gpd</i> start<br>codon & 1st intron /<br>eGFP                            |
| M   | F | TCATCGTCTTACTTCTGCAATCATCATG<br>GCCTCCTCCGAGGACGTCATCAAGGAGTTC                                    | mRFP through <i>A. nidulans</i><br><i>trpC</i> terminator from pCAM-<br>hph-simRFP                          | <i>A. mellea gpd</i><br>promoter / mRFP                                               |
| N   | F | CATCTGACTCATTATTGATTCTCGTAG<br>GCCTCCTCCGAGGACGTCATCAAGGAGTTC                                     | mRFP through <i>A. nidulans</i><br><i>trpC</i> terminator from pCAM-<br>hph-simRFP                          | <i>A. mellea gpd</i><br>promoter & 1st<br>intron / mRFP                               |
| Q   | R | GAACTCCTTGATGACGTCTCGGAGGAGGC<br>CTACGAGAATACAATGAATGAGTACAGATG<br>ATACGTAAGCAACGACGAGACGCTACCAT  | Primer dimer of 1 <sup>st</sup> intron<br>from <i>A. mellea gpd</i> (protein ID<br>13125)                   | <i>A. mellea gpd</i><br>promoter & 1st<br>intron / mRFP gene                          |

|          |   |                                                                  |                                                                                                                           |                                                                                |
|----------|---|------------------------------------------------------------------|---------------------------------------------------------------------------------------------------------------------------|--------------------------------------------------------------------------------|
| <b>R</b> | F | CTCATCGTCTTACACTTCTGCAATCATCATG<br>CCGGTCAGTACACCACACAGCCCGACCGC | Intron/exon region from <i>P. chrysosporium gpd</i> through eGFP & <i>A. nidulans trpC</i> terminator from pCAM-hph-xiGFP | <i>A. mellea gpd</i> promoter / <i>P. chrysosporium gpd</i> intron/exon region |
| <b>S</b> | R | TGCTTTGACCTGGAAAGCGAAGTCAGCACG                                   | Intron/exon region from <i>P. chrysosporium gpd</i> from pCAM-hph-xiGFP                                                   | <i>P. chrysosporium gpd</i> intron/exon region                                 |
| <b>T</b> | F | CGTGCTGACTTCGCTTTCCAGGTCAAAGCA<br>GCCTCCTCCGAGGACGTCATCAAGGAGTTC | mRFP through <i>A. nidulans trpC</i> terminator from pCAM-hph-simRFP                                                      | <i>P. chrysosporium gpd</i> intron/exon region / mRFP                          |

pBGgHg is from Chen *et al.* (2000)<sup>30</sup>, pGR4-GFP and pGR4-4iGM3 were constructed by Burns *et al.* (2005)<sup>23</sup> and pYES-hph-RFP004 was constructed by Collins *et al.* (2010)<sup>24</sup>.

**Supplementary Table S3 – Primers used to evaluate constructed vectors and transformed fungi**

| Primer             | Sequence (5' to 3')            | Description                                                                                            | Reference  |
|--------------------|--------------------------------|--------------------------------------------------------------------------------------------------------|------------|
| LB forward         | GA CTGATGGGCTGCCTGTATCGAG      | Amplifies region between LB and RB of pCAM-hph-series when testing recombinant <i>E. coli</i> colonies | 16         |
| RB reverse         | GTGGTTGGCATGCACATACAAATG       |                                                                                                        |            |
| <i>hph</i> forward | GCGTGGATATGTCCTGCGGG           | Amplifies 600 bp of <i>hph</i> gene to ascertain transgene presence                                    | 25         |
| <i>hph</i> reverse | CCATACAAGCCAACCACGGC           |                                                                                                        |            |
| GFP forward        | ACGGCGACGTAAACGGCC             | Amplifies 600 bp of GFP to ascertain transgene presence                                                | 25         |
| GFP reverse        | GTGATCGCGCTTCTCGTT             |                                                                                                        |            |
| mRFP forward       | GCCTCCTCCGAGGACGTCATCAAGGAGTTC | Amplifies 674 bp of mRFP to ascertain transgene presence                                               | This paper |
| mRFP reverse       | TTAGGCGCCGGTGGAGTGGCGGCCCTCGGC |                                                                                                        |            |

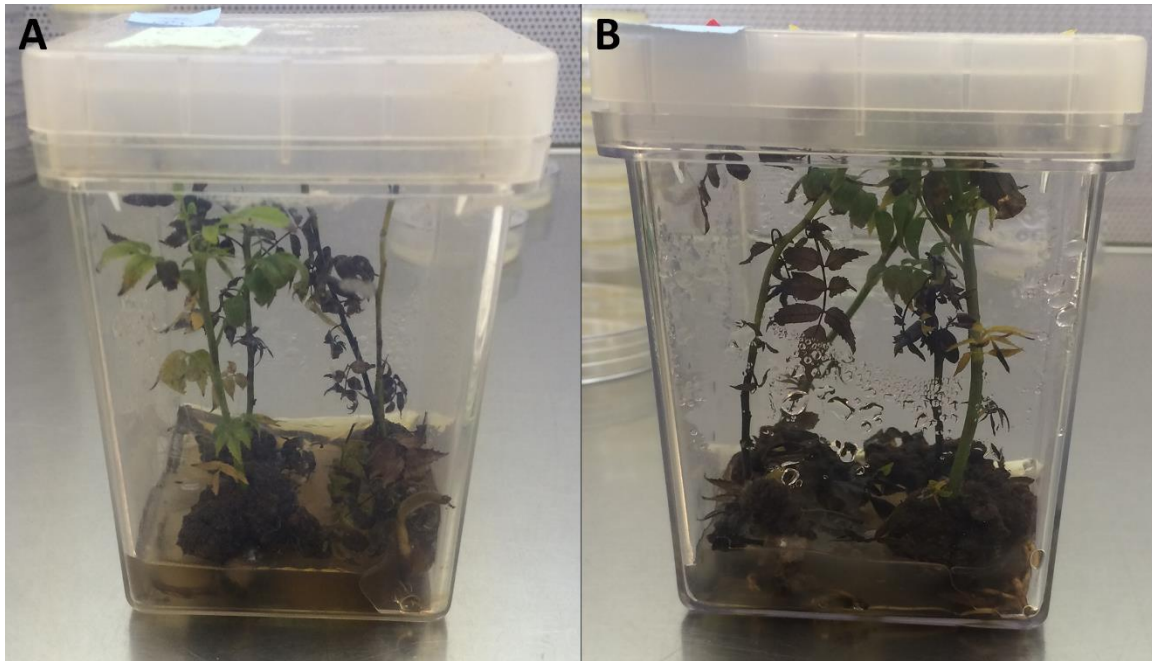

**Supplementary Figure S1** – Plants inoculated with transformants ELDO17-Amgpd-xiGFP2 (A) and ELDO17-Amgpd-ximRFP1 (B), 6 weeks after inoculation. Between 4-6 weeks post-inoculation, leaves were either green with chlorotic/necrotic margins or completely brown and dead.

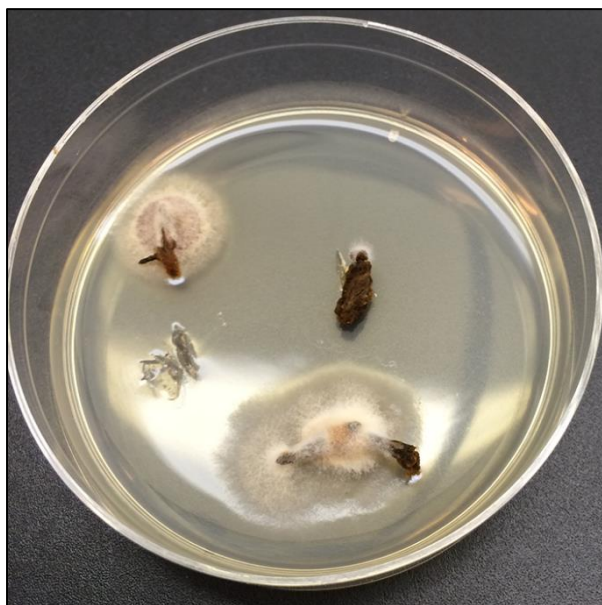

**Supplementary Figure S2** – *Armillaria mellea* colonies recovered from three root fragments, which were sampled from a walnut plant inoculated with ELDO17-Amgpd-xiGFP2, 6 weeks after inoculation.
